# Supplementary material for: Milk Exosome-Derived MicroRNA-2478 Suppresses Melanogenesis through the Akt-GSK3β Pathway
Source: MDPI journal article supplement (doi:10.3390/cells10112848), 2021-10-22
Supplement: s1 [file s1]

**Fig. S1**

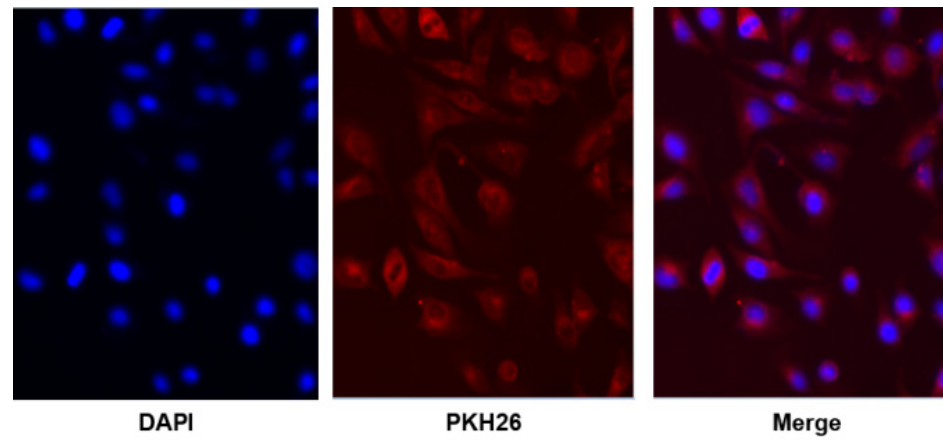

**Figure S1.** B16F10 cells were incubated with 50  $\mu\text{g/ml}$  milk exosomes labeled with PKH26 (red) and were analyzed by fluorescence microscopy. Nuclei were stained with 4',6-diamidino-2-phenylindole (DAPI; blue).

**Fig. S2**

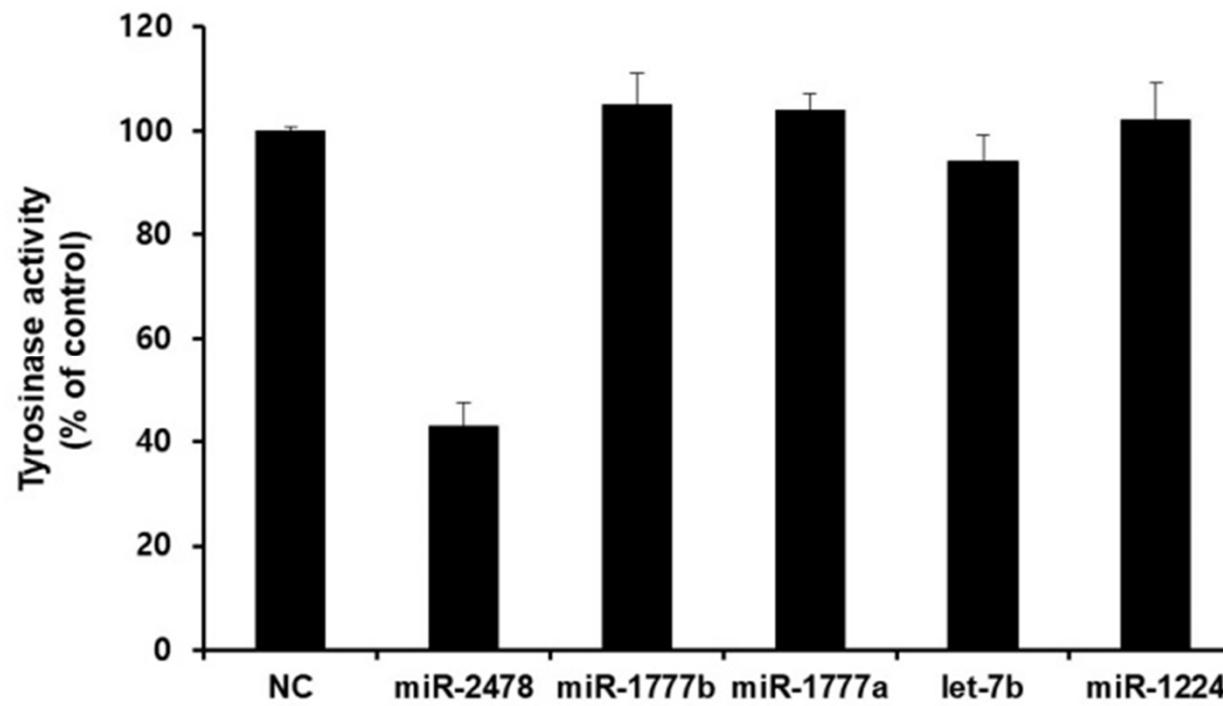

**Figure S2.** Tyrosinase activity was assessed after treatment with microRNAs.
